# Supplementary material
Source: PubMed Central journal article supplement (PMC4479339)

## SUPPLEMENTAL MATERIAL

### **Plasma phospholipid transfer protein (PLTP) activity inversely correlates with carotid artery disease: Effects of paraoxonase 1 enzyme activity and genetic variants on PLTP activity**

Daniel Seung Kim<sup>1-3</sup>, Amber A. Burt<sup>1</sup>, Jane E. Ranchalis<sup>1</sup>, Simona Vuletic<sup>4-5</sup>, Tomas Vaisar<sup>5</sup>, Wan-Fen Li<sup>1</sup>, Elisabeth A. Rosenthal<sup>1</sup>, Weijiang Dong<sup>4-6</sup>, Jason F. Eintracht<sup>7</sup>, Arno G. Motulsky<sup>1-2</sup>, John D. Brunzell<sup>5</sup>, John J. Albers<sup>4-5</sup>, Clement E. Furlong<sup>1-2</sup>, Gail P. Jarvik<sup>1-2</sup>

Address for Correspondence:  
Gail P. Jarvik, M.D., Ph.D.  
Medical Genetics, Box 357720  
University of Washington  
Seattle, WA 98195-7720  
Email: [pair@u.washington.edu](mailto:pair@u.washington.edu)

1. Division of Medical Genetics, Department of Medicine, University of Washington School of Medicine, Seattle, WA
2. Department of Genome Sciences, University of Washington School of Medicine, Seattle, WA
3. Department of Biostatistics, University of Washington School of Public Health, Seattle, WA
4. Northwest Lipid Metabolism and Diabetes Research Laboratories, Seattle, WA
5. Division of Metabolism, Endocrinology, and Nutrition, Department of Medicine, University of Washington School of Medicine, Seattle, WA
6. Xi'an Jiaotong University, School of Medicine, Department of Human Anatomy and Histology and Embryology, Xi'an 710061, People's Republic of China
7. Department of General Medicine, Virginia Mason Medical Center, Seattle, WA

**Supplemental Table S1. Demographic and clinical characteristics of the studied CLEAR subset stratified by CAAD case status.**

| Variable                  | N    | CAAD Controls<br>(n=622) | CAAD Cases<br>(n=493) | Total<br>(n=1115) | P-Value              |
|---------------------------|------|--------------------------|-----------------------|-------------------|----------------------|
| Censored age, y           | 1115 | 66.7 ± 8.0               | 66.5 ± 9.1            | 66.6 ± 8.5        | 0.98 <sup>a</sup>    |
| Female, %                 | 1115 | 106 (17%)                | 60 (12%)              | 166 (15%)         | 0.031 <sup>b</sup>   |
| Diabetic, %               | 1115 | 61 (10%)                 | 115 (23%)             | 176 (16%)         | < 0.001 <sup>b</sup> |
| BMI, kg/m <sup>2</sup>    | 1115 | 28.4 ± 5.0               | 27.9 ± 4.7            | 28.2 ± 4.9        | 0.14 <sup>a</sup>    |
| Statin use, %             | 1115 | 109 (18%)                | 353 (72%)             | 462 (41%)         | < 0.001 <sup>b</sup> |
| Current smoking status, % | 1115 | 35 (6%)                  | 94 (19%)              | 129 (11%)         | < 0.001 <sup>b</sup> |
| Total cholesterol, mg/dl  | 1100 | 197 ± 40                 | 176 ± 40              | 187 ± 41          | < 0.001 <sup>a</sup> |
| apoA1, mg/dl              | 1110 | 148 ± 28                 | 138 ± 27              | 144 ± 28          | < 0.001 <sup>a</sup> |
| HDL-C, mg/dl              | 1100 | 53 ± 17                  | 47 ± 15               | 50 ± 17           | < 0.001 <sup>a</sup> |
| HDL-2, mg/dl              | 1098 | 10 ± 6.5                 | 8.6 ± 5.8             | 9.6 ± 6.3         | < 0.001 <sup>a</sup> |
| HDL-3, mg/dl              | 1099 | 43 ± 12                  | 38 ± 11               | 41 ± 11           | < 0.001 <sup>a</sup> |
| Ln(Triglycerides)         | 1100 | 4.7 ± 0.56               | 4.8 ± 0.55            | 4.8 ± 0.56        | < 0.001 <sup>a</sup> |
| Ln(VLDL)                  | 1100 | 3.1 ± 0.55               | 3.3 ± 0.54            | 3.2 ± 0.55        | < 0.001 <sup>a</sup> |
| PON1 AREase activity, IU  | 1077 | 148 ± 50                 | 128 ± 50              | 139 ± 50          | < 0.001 <sup>a</sup> |
| PLTPa, μM/hr              | 1115 | 13.8 ± 4.2               | 13.2 ± 4.7            | 13.5 ± 4.4        | 0.008 <sup>a</sup>   |

Abbreviations: apoA1 = apolipoprotein A1; BMI = body mass index; CAAD = carotid artery disease; censored age = age at CAAD diagnosis for cases, age at enrollment for controls; CLEAR = Carotid Lesion Epidemiology and Risk cohort; HDL = high-density lipoprotein; PON1 AREase activity = Paraoxonase 1 arylester hydrolysis activity; PLTPa = phospholipid transfer protein activity; VLDL = very-low-density lipoprotein.

Tests used for p-value calculations for differences between subsets: <sup>a</sup> = Wilcoxon rank sum test; <sup>b</sup> = Pearson chi-square test.

**Supplemental Table S2. Sensitivity analysis of PLTPa predictors from stepwise linear regression in controls (n=601).\***

| <b>Variable</b>        | <b>Coefficient ± SE</b> | <b>% PLTPa</b> | <b>P-Value</b> |
|------------------------|-------------------------|----------------|----------------|
| <i>Intercept</i>       | 11.79 ± 2.16            | -              | -              |
| Current age            | 0.00014 ± 0.025         | 0.12%          | 0.99           |
| Female gender          | -0.13 ± 0.52            | 0.066%         | 0.79           |
| Ln(Triglycerides)      | 0.92 ± 0.35             | 1.31%          | 0.0097         |
| Diabetes status        | 1.73 ± 0.61             | 1.69%          | 0.0045         |
| PON1 AREase activity   | 0.0056 ± 0.0042         | 0.53%          | 0.19           |
| Current smoking status | 1.07 ± 0.77             | 0.37%          | 0.17           |
| apoA1, mg/dl           | 0.0078 ± 0.0079         | 0.19%          | 0.32           |
| Statin use             | -1.02 ± 0.48            | 0.54%          | 0.037          |

Abbreviations: apoA1 = apolipoprotein A1; PON1 AREase activity = paraoxonase 1 arylester hydrolysis enzymatic activity; PLTPa = phospholipid transfer protein activity.

*\*These analyses relate to **Table 2** in the main manuscript. They show the association of each individual covariate identified as predictive of PLTP activity stratified by CAAD status (associations for CAAD controls reported in this table).*

**Supplemental Table S3. Sensitivity analysis of PLTPa predictors from stepwise linear regression in CAAD cases (n=455).\***

| <b>Variable</b>        | <b>Coefficient ± SE</b> | <b>% PLTPa</b> | <b>P-Value</b> |
|------------------------|-------------------------|----------------|----------------|
| <i>Intercept</i>       | 11.28 ± 2.67            | -              | -              |
| Current age            | -0.031 ± 0.028          | 1.12%          | 0.48           |
| Female gender          | -1.04 ± 0.72            | 0.19%          | 0.15           |
| Ln(Triglycerides)      | 0.98 ± 0.46             | 1.59%          | 0.034          |
| Diabetes status        | 0.93 ± 0.51             | 0.52%          | 0.074          |
| PON1 AREase activity   | 0.011 ± 0.0048          | 1.31%          | 0.023          |
| Current smoking status | 0.18 ± 0.59             | 0.016%         | 0.75           |
| apoA1, mg/dl           | 0.0043 ± 0.0091         | 0.048%         | 0.64           |
| Statin use             | 0.13 ± 0.53             | 0.13%          | 0.80           |

Abbreviations: apoA1 = apolipoprotein A1; PON1 AREase activity = paraoxonase 1 arylester hydrolysis enzymatic activity; PLTPa = phospholipid transfer protein activity.

*\*These analyses relate to **Table 2** in the main manuscript. They show the association of each individual covariate identified as predictive of PLTP activity stratified by CAAD status (associations for CAAD cases reported in this table).*

**Supplemental Table S4. PLTPa predicts CAAD status adjusting for confounders through multivariate logistic regression (n=1056)\*.**

| <b>Variable</b>                   | <b>OR (95% CI)</b> | <b>% CAAD Prediction</b> | <b>P-Value</b>         |
|-----------------------------------|--------------------|--------------------------|------------------------|
| Censored Age                      | 1.00 (0.99-1.02)   | 0.054%                   | 0.58                   |
| Female Gender                     | 1.07 (0.69-1.64)   | 0.65%                    | 0.79                   |
| Ln(Triglycerides) <sup>a</sup>    | 1.27 (1.06-1.53)   | 2.34%                    | 0.005                  |
| Diabetes Status                   | 3.25 (2.24-4.74)   | 3.59%                    | 6.31x10 <sup>-9</sup>  |
| PON1 AREase activity <sup>b</sup> | 0.94 (0.92-0.98)   | 2.69%                    | 0.001                  |
| Current Smoking Status            | 4.55 (2.92-7.21)   | 4.34%                    | 1.38x10 <sup>-12</sup> |
| apoA1 <sup>b</sup>                | 0.96 (0.90-1.02)   | 0.30%                    | 0.12                   |
| PLTPa <sup>c</sup>                | 0.91 (0.88-0.94)   | 2.92%                    | 7.90x10 <sup>-9</sup>  |

Abbreviations: apoA1 = apolipoprotein A1; CAAD = carotid artery disease; PON1 AREase activity = paraoxonase 1 arylester hydrolysis enzymatic activity; PLTPa = phospholipid transfer protein activity.

<sup>a</sup> Reported odds ratio for ln(triglyceride) association with CAAD odds is for a 2-fold increase in triglycerides.

<sup>b</sup> Reported odds ratios for PON1 AREase activity and apoA1 associations with CAAD odds are for a 10 unit increase in each respective covariate.

<sup>c</sup> PLTPa adjusted for statin use by the average decrease seen in controls using statins (-1.02).

\*1056 participants had complete data on all parameters considered in this stepwise linear regression model. All included covariates were previously associated with PLTPa (see **Table 2**).

**Supplemental Table S5. *PLTP* and local region SNP associations ( $P \leq 0.05$ ) with covariate-adjusted odds of CAAD (logistic regression) and PLTPa (linear regression).**

| SNP              | Position <sup>a</sup> | Gene <sup>b</sup> | Function              | MAF     | N    | CAAD OR (95% CI) <sup>c</sup> | CAAD P <sup>c</sup> | PLTP Beta <sup>d</sup> | PLTP P <sup>d</sup> |
|------------------|-----------------------|-------------------|-----------------------|---------|------|-------------------------------|---------------------|------------------------|---------------------|
| rs4810479        | 20:44545048           | ( <i>PLTP</i> )   | 5'                    | 0.253   | 1025 | 0.84 (0.67-1.04)              | 0.097               | -1.183                 | 2.63E-07            |
| rs4812975        | 20:44545460           | ( <i>PLTP</i> )   | 5'                    | 0.253   | 1022 | 0.84 (0.68-1.05)              | 0.12                | -1.043                 | 2.28E-06            |
| rs2868346        | 20:44547970           | ( <i>PLTP</i> )   | 5'                    | 0.2486  | 1015 | 0.84 (0.67-1.04)              | 0.11                | -1.012                 | 4.60E-06            |
| rs6065904        | 20:44534651           | <i>PLTP</i>       | Intron 8 <sup>e</sup> | 0.2212  | 1025 | 0.74 (0.59-0.94)              | 0.012               | -1.054                 | 1.35E-05            |
| chr20:44546198:D | 20:44546198           | ( <i>PLTP</i> )   | TA>T Del              | 0.1867  | 1001 | 0.77 (0.60-0.99)              | 0.040               | -1.056                 | 1.91E-05            |
| rs73307905       | 20:44545773           | ( <i>PLTP</i> )   | 5'                    | 0.1863  | 1021 | 0.77 (0.59-0.98)              | 0.034               | -1.058                 | 1.94E-05            |
| rs7679           | 20:44576502           | <i>PCIF1</i>      | 3'UTR                 | 0.1772  | 987  | 0.76 (0.59-0.98)              | 0.035               | -1.102                 | 2.84E-05            |
| rs58847685       | 20:44544947           | ( <i>PLTP</i> )   | 5'                    | 0.1863  | 1018 | 0.78 (0.61-0.99)              | 0.044               | -1.03                  | 3.28E-05            |
| rs111602331      | 20:44557474           | ( <i>PLTP</i> )   | 5'                    | 0.1753  | 986  | 0.73 (0.57-0.95)              | 0.017               | -1.048                 | 4.35E-05            |
| rs139953093      | 20:44559748           | ( <i>PLTP</i> )   | 5'                    | 0.1767  | 982  | 0.76 (0.59-0.99)              | 0.038               | -1.03                  | 4.73E-05            |
| rs6073957        | 20:44549476           | ( <i>PLTP</i> )   | 5'                    | 0.1841  | 1019 | 0.77 (0.60-0.98)              | 0.034               | -0.9936                | 5.98E-05            |
| rs118024629      | 20:44546197           | ( <i>PLTP</i> )   | 5'                    | 0.1852  | 1019 | 0.76 (0.60-0.98)              | 0.031               | -0.9902                | 6.33E-05            |
| rs12185764       | 20:44550020           | ( <i>PLTP</i> )   | 5'                    | 0.1847  | 1019 | 0.76 (0.60-0.98)              | 0.031               | -0.9902                | 6.33E-05            |
| rs59329875       | 20:44547672           | ( <i>PLTP</i> )   | 5'                    | 0.1852  | 1019 | 0.76 (0.60-0.98)              | 0.031               | -0.9902                | 6.33E-05            |
| rs73307913       | 20:44548301           | ( <i>PLTP</i> )   | 5'                    | 0.1852  | 1019 | 0.76 (0.60-0.98)              | 0.031               | -0.9902                | 6.33E-05            |
| rs6065906        | 20:44554015           | ( <i>PLTP</i> )   | 5'                    | 0.1849  | 1011 | 0.75 (0.59-0.96)              | 0.025               | -0.986                 | 6.80E-05            |
| rs12185776       | 20:44551600           | ( <i>PLTP</i> )   | 5'                    | 0.1841  | 1017 | 0.77 (0.60-0.98)              | 0.035               | -0.9682                | 9.18E-05            |
| rs6073958        | 20:44551855           | ( <i>PLTP</i> )   | 5'                    | 0.1937  | 998  | 0.82 (0.64-1.04)              | 0.099               | -0.9515                | 0.0001              |
| rs6073952        | 20:44536932           | <i>PLTP</i>       | Intron 4 <sup>e</sup> | 0.1974  | 1025 | 0.80 (0.63-1.01)              | 0.069               | -0.8945                | 0.0003              |
| rs6073966        | 20:44570192           | <i>PCIF1</i>      | Intron 7 <sup>f</sup> | 0.1644  | 986  | 0.75 (0.58-0.98)              | 0.031               | -0.9076                | 0.0004              |
| rs6065905        | 20:44537837           | <i>PLTP</i>       | Intron 4 <sup>e</sup> | 0.198   | 1018 | 0.81 (0.64-1.03)              | 0.080               | -0.8009                | 0.0009              |
| rs378114         | 20:44538427           | <i>PLTP</i>       | Intron 3 <sup>e</sup> | 0.2656  | 1025 | 0.95 (0.77-1.17)              | 0.61                | 0.5145                 | 0.024               |
| rs435306         | 20:44538484           | <i>PLTP</i>       | Intron 3 <sup>e</sup> | 0.2656  | 1025 | 0.95 (0.77-1.17)              | 0.61                | 0.5145                 | 0.024               |
| rs4810478        | 20:44544732           | ( <i>PLTP</i> )   | 5'                    | 0.05424 | 1004 | 1.13 (0.75-1.71)              | 0.55                | -0.8958                | 0.036               |
| rs6073955        | 20:44544571           | ( <i>PLTP</i> )   | 5'                    | 0.05424 | 1004 | 1.13 (0.75-1.71)              | 0.55                | -0.8958                | 0.036               |
| rs2903809        | 20:44552895           | ( <i>PLTP</i> )   | 5'                    | 0.2705  | 998  | 0.93 (0.75-1.15)              | 0.49                | 0.447                  | 0.037               |
| rs3843763        | 20:44548193           | ( <i>PLTP</i> )   | 5'                    | 0.2721  | 1004 | 0.93 (0.76-1.15)              | 0.53                | 0.4247                 | 0.048               |

|             |             |                  |         |         |     |                  |      |       |         |
|-------------|-------------|------------------|---------|---------|-----|------------------|------|-------|---------|
| rs41305805  | 20:44587926 | <i>ZNF335</i>    | Phe>Val | 0.01749 | 995 | 1.18 (0.61-2.28) | 0.63 | 1.335 | 0.049   |
| rs118013520 | 20:44563133 | ( <i>PCIF1</i> ) | 5'      | 0.0175  | 995 | 1.18 (0.61-2.27) | 0.62 | 1.329 | 0.04933 |
| rs181914932 | 20:44561279 | ( <i>PCIF1</i> ) | 5'      | 0.0175  | 995 | 1.18 (0.61-2.27) | 0.62 | 1.329 | 0.04933 |
| rs79629788  | 20:44562148 | ( <i>PCIF1</i> ) | 5'      | 0.0175  | 995 | 1.18 (0.61-2.27) | 0.62 | 1.329 | 0.04933 |

Abbreviations: Beta = beta coefficient from linear regression; CI = confidence interval; MAF = minor allele frequency; OR = odds ratio.

<sup>a</sup> = Position based on hg19/GRCh37.

<sup>b</sup> = Noncoding SNPs are represented in parentheses naming the nearest gene, e.g. (*PLTP*).

<sup>c</sup> = Logistic regression analyses adjusted by censored age, sex, diabetes status, ln(triglyceride levels), current smoking status, and PON1 AREase activity.

<sup>d</sup> = Linear regression analyses adjusted by age, sex, diabetes status, statin use, ln(triglyceride levels), current smoking status and PON1 AREase activity.

<sup>e</sup> = *PLTP* gene has 14 total introns.

<sup>f</sup> = *PCIF1* gene has 15 total introns.

**Supplemental Figure S1. Linkage disequilibrium (LD) of *PTLP* and surrounding genomic region SNPs with minor allele frequency greater than 5%.** This plot demonstrates the local correlation ( $R^2$ ), or LD, of *PLTP* region SNPs that were studied. Red denotes strong correlation, indicating that these SNPs' genotypes (which create "haplotypes") are inherited together frequently, while white indicates no correlation. Note the lack of solid "blocks" of SNPs in LD (continuous red blocks) that would indicate large regions or haplotypes are inherited together.

Pairwise LD for SNPs in *PLTP* locus and surrounding region

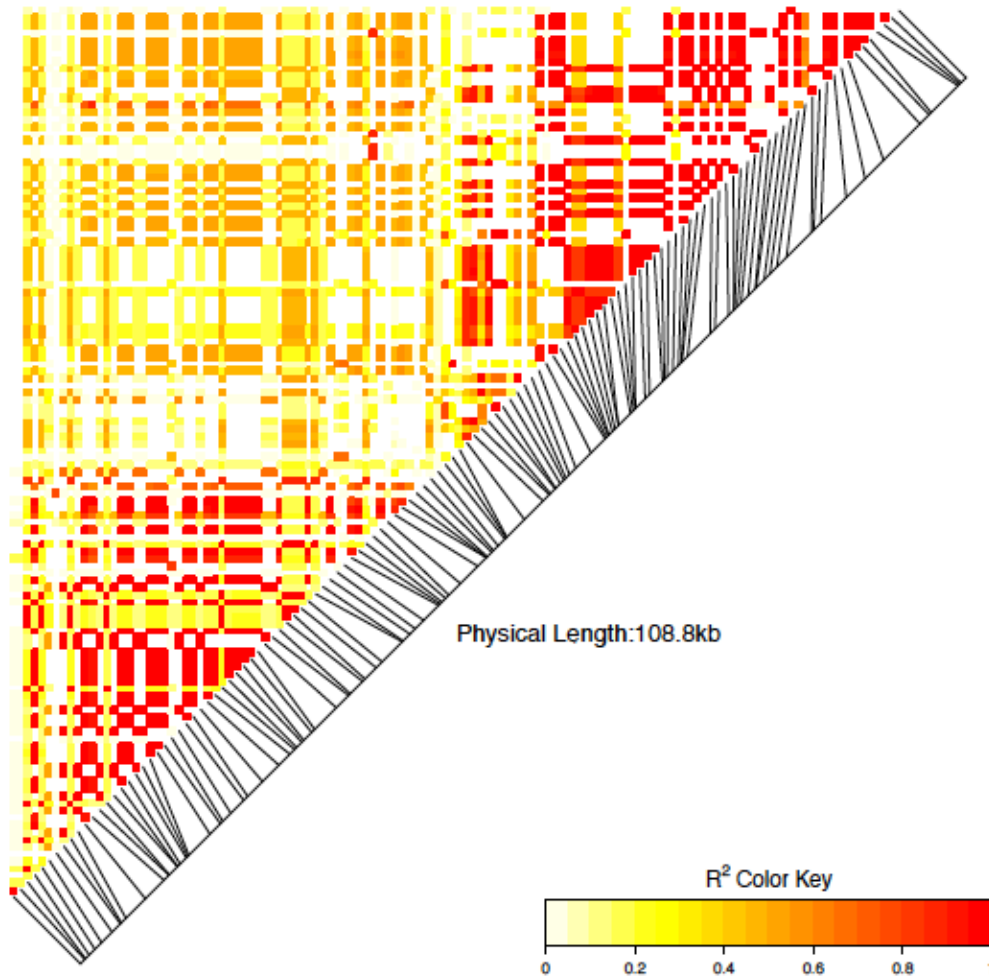

Supplement: supp_P058032_jlr.P058032-1.pdf [file supp_P058032_jlr.P058032-1.pdf]
